# Supplementary material for: Cardioprotective role of APIP in myocardial infarction through ADORA2B
Source: PubMed Central journal article supplement (PMC6602929; doi:10.1038/s41419-019-1746-3), 2019-07-01

Supplementary Figure 6.

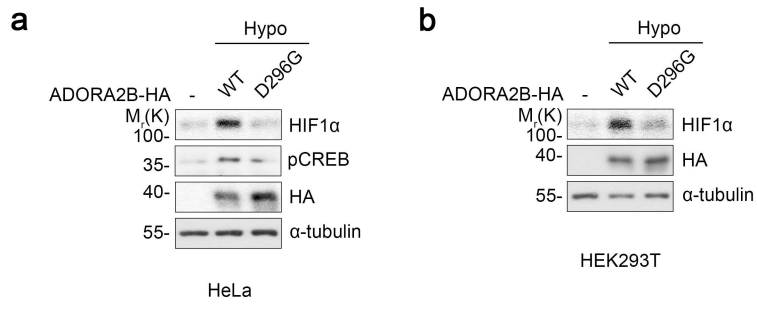

Supplement: 41419_2019_1746_MOESM6_ESM.pdf [file 41419_2019_1746_MOESM6_ESM.pdf]
