# Supplementary material for: Cardioprotective role of APIP in myocardial infarction through ADORA2B
Source: PubMed Central journal article supplement (PMC6602929; doi:10.1038/s41419-019-1746-3), 2019-07-01

**a**

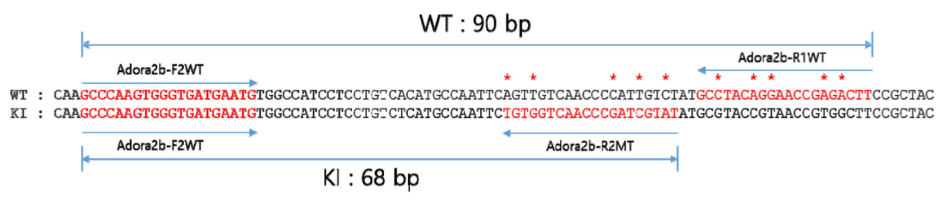

**b**

|    |          |          |          |          |          |          |          |          |          |          |          |          |          |          |          |          |          |   |   |   |   |   |   |   |   |   |   |   |   |   |   |   |   |   |   |   |   |   |   |   |   |   |   |   |   |   |   |   |   |
|----|----------|----------|----------|----------|----------|----------|----------|----------|----------|----------|----------|----------|----------|----------|----------|----------|----------|---|---|---|---|---|---|---|---|---|---|---|---|---|---|---|---|---|---|---|---|---|---|---|---|---|---|---|---|---|---|---|---|
|    | 283      | 284      | 285      | 286      | 287      | 288      | 289      | 290      | 291      | 292      | 293      | 294      | 295      | 296      | 297      | 298      | 299      |   |   |   |   |   |   |   |   |   |   |   |   |   |   |   |   |   |   |   |   |   |   |   |   |   |   |   |   |   |   |   |   |
|    | <b>S</b> | <b>V</b> | <b>V</b> | <b>N</b> | <b>P</b> | <b>I</b> | <b>V</b> | <b>Y</b> | <b>A</b> | <b>Y</b> | <b>R</b> | <b>N</b> | <b>R</b> | <b>D</b> | <b>F</b> | <b>R</b> | <b>Y</b> |   |   |   |   |   |   |   |   |   |   |   |   |   |   |   |   |   |   |   |   |   |   |   |   |   |   |   |   |   |   |   |   |
| WT | T        | C        | A        | G        | T        | T        | G        | T        | C        | A        | A        | C        | C        | C        | A        | T        | T        | G | T | C | T | A | T | G | C | C | T | A | C | A | G | G | A | A | C | C | G | A | G | A | C | T | T | C | C | G | T | A | C |
| KI | T        | C        | T        | G        | T        | G        | G        | T        | C        | A        | A        | C        | C        | G        | A        | T        | C        | G | T | A | T | A | T | G | C | G | T | A | A | C | C | G | T | G | G | C | T | T | C | C | G | T | A | C |   |   |   |   |   |
|    | <b>S</b> | <b>V</b> | <b>V</b> | <b>N</b> | <b>P</b> | <b>I</b> | <b>V</b> | <b>Y</b> | <b>A</b> | <b>Y</b> | <b>R</b> | <b>N</b> | <b>R</b> | <b>G</b> | <b>F</b> | <b>R</b> | <b>Y</b> |   |   |   |   |   |   |   |   |   |   |   |   |   |   |   |   |   |   |   |   |   |   |   |   |   |   |   |   |   |   |   |   |

**c**

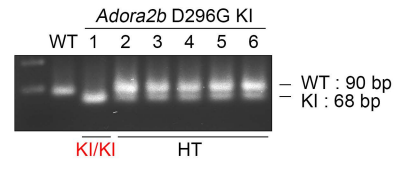

Supplement: 41419_2019_1746_MOESM7_ESM.pdf [file 41419_2019_1746_MOESM7_ESM.pdf]
