# Supplementary material for: Cardioprotective role of APIP in myocardial infarction through ADORA2B
Source: PubMed Central journal article supplement (PMC6602929; doi:10.1038/s41419-019-1746-3), 2019-07-01
Supplement: 41419_2019_1746_MOESM9_ESM.pdf [file 41419_2019_1746_MOESM9_ESM.pdf]

Supplementary Table 1.

| Control |                    |               |     |     | Heart failure |                    |         |     |     |
|---------|--------------------|---------------|-----|-----|---------------|--------------------|---------|-----|-----|
|         | ANONYMIZATION CODE | DISEASE       | AGE | SEX |               | ANONYMIZATION CODE | DISEASE | AGE | SEX |
| N1      | Donor 1            | Donor/Control | 52  | F   | F1            | HF 1               | IHD     | 48  | M   |
| N2      | Donor 2            | Control       | ?   | ?   | F2            | HF 2               | IDC     | 61  | M   |
| N3      | Donor 3            | Normal        | 58  | F   | F3            | HF 3               | CHF     | 66  | F   |
| N4      | Donor 4            | Control       | 58  | F   | F4            | HF 4               | DCM     |     | F   |
| N5      | Donor 5            | Control       | 54  | M   | F5            | HF 5               | DCM     | 66  | F   |
| N6      | Donor 6            | Control       | 51  | M   | F6            | HF 6               | IHD     | 69  | F   |
| N7      | Donor 7            | Donor         | 61  | F   | F7            | HF7                | HF      | ?   | ?   |
| N8      | Donor 8            | Donor         | 61  | F   | F8            | NDRI 3             | HF      | 61  | M   |
| N9      | NDRI 4             | normal        | 50  | F   | F9            | NDRI 2             | HF      | 48  | M   |
| N10     | NDRI 8             | normal        | 61  | M   | F10           | NDRI 7             | HF      | 71  | M   |
| N11     | NDRI 9             | normal        | 58  | M   | F11           | 106                | DCM     | 65  | CF  |
| N12     | 13                 | NORMAL        | 17  | M   | F12           | 123                | DCM     | 47  | M   |
| N13     | 29                 | NORMAL        | 24  | F   | F13           | 143                | DCM     | 55  | CF  |
| N14     | 44                 | NORMAL        | 33  | CM  | F14           | 145                | DCM     | 57  | CM  |
| N15     | 48                 | NORMAL        | 69  | F   | F15           | 152                | DCM     | 25  | HM  |
| N16     | 54                 | NORMAL        | 35  | CM  | F17           | 197                | DCM     | 28  | CM  |
| N17     | 55                 | NORMAL        | 16  | F   | F18           | 218                | DCM     | 60  | CM  |
| N18     | 71                 | NORMAL        | 71  | CF  | F19           | 234                | DCM     | 36  | M   |
| N19     | 75                 | NORMAL        | 58  | CM  |               |                    |         |     |     |
| N20     | 76                 | NORMAL        | 61  | CF  |               |                    |         |     |     |
| N21     | 77                 | NORMAL        | 70  | CF  |               |                    |         |     |     |
| N22     | 87                 | NORMAL        | 60  | CM  |               |                    |         |     |     |
| N23     | 90                 | NORMAL        | 54  | CF  |               |                    |         |     |     |
| N24     | 95                 | NORMAL        | 56  | CM  |               |                    |         |     |     |
| N25     | 97                 | NORMAL        | 73  | F   |               |                    |         |     |     |
| N26     | 110                | NORMAL        | 42  | CM  |               |                    |         |     |     |
| N27     | 174                | NORMAL        | 18  | CF  |               |                    |         |     |     |
| N28     | 178                | NORMAL        | 29  | HM  |               |                    |         |     |     |
| N29     | 246                | NORMAL        | 20  | OM  |               |                    |         |     |     |
